# Supplementary material
Source: PubMed Central journal article supplement (PMC6669789)
Supplement: jamacardiol-4-885-s001.pdf [file jamacardiol-4-885-s001.pdf]

## Supplementary Online Content

Elnabawi YA, Oikonomou EK, Dey AK, et al. Association of biologic therapy with coronary inflammation in patients with psoriasis as assessed by perivascular fat attenuation index. *JAMA Cardiol*. Published online July 31, 2019. doi:10.1001/jamacardio.2019.2589

**eFigure.** Recruitment Scheme.

**eTable.** Change in Perivascular FAI (HU) in the Presence or Absence of Coronary Plaque

**This supplementary material has been provided by the authors to give readers additional information about their work.**

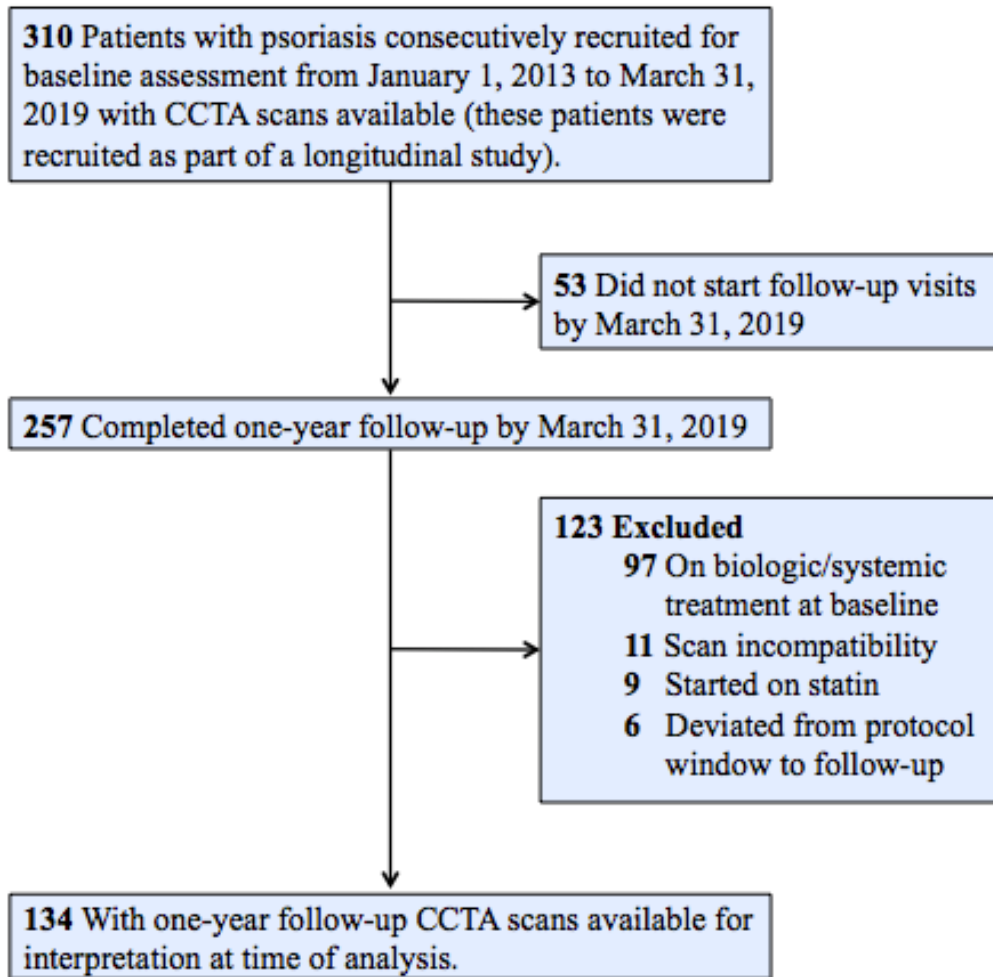

**eFigure.** Recruitment Scheme.

**eTable.** Change in Perivascular FAI (HU) in the Presence or Absence of Coronary Plaque

|                             | No plaque                |                          |                             | Presence of Plaque       |                          |                          |
|-----------------------------|--------------------------|--------------------------|-----------------------------|--------------------------|--------------------------|--------------------------|
|                             | Baseline                 | One year                 | P value                     | Baseline                 | One year                 | P value                  |
| <b>Biologic treated</b>     | -71.18 (-75.87 - -69.00) | -76.92 (-80.15 - -69.47) | <b>P&lt;0.001</b><br>(n=55) | -71.25 (-74.55 - -65.79) | -75.57 (-80.06 - -70.67) | <b>P=0.001</b><br>(n=27) |
| <b>Non-biologic treated</b> | -74.30 (-78.08 - -67.06) | -72.72 (-78.08 - -67.73) | P=0.84<br>(n=33)            | -69.50 (-76.01 - -65.30) | -70.53 (-79.16 - -67.40) | P=0.26<br>(n=19)         |

Change in perivascular FAI over one-year was derived from a Wilcoxon signed-rank test. FAI: Fat attenuation index; HU: Hounsfield Units.
